# Supplementary material for: Co-Al-CO 3 layered double hydroxide: an efficient and regenerable catalyst for glycolysis of polyethylene terephthalate
Source: Royal Society of Chemistry journal article supplement (doi:10.1039/d3su00304c), 2023-01-01
Supplement: d3su00304c1.pdf [file d3su00304c1.pdf]

## Supporting information

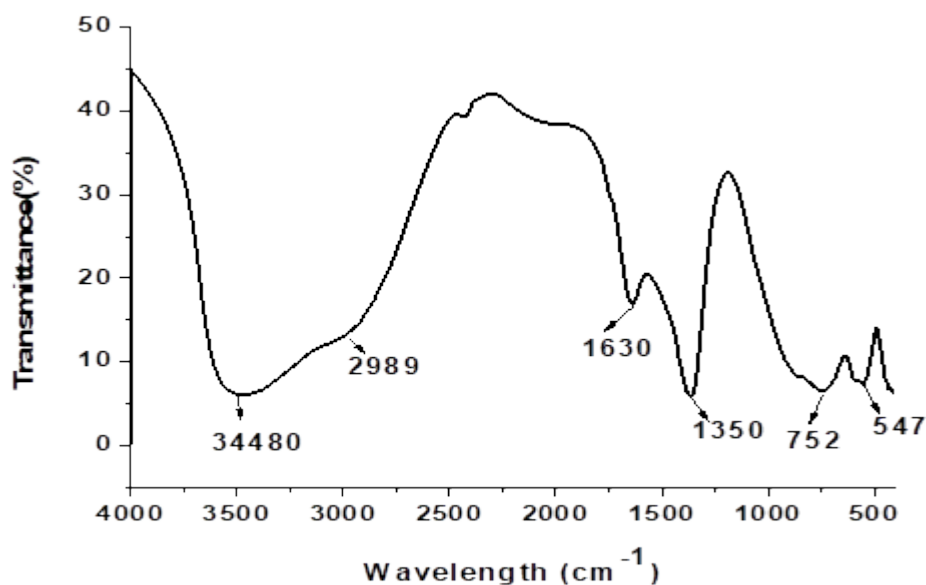

Fig.S<sub>1</sub> FTIR of CoAl-31

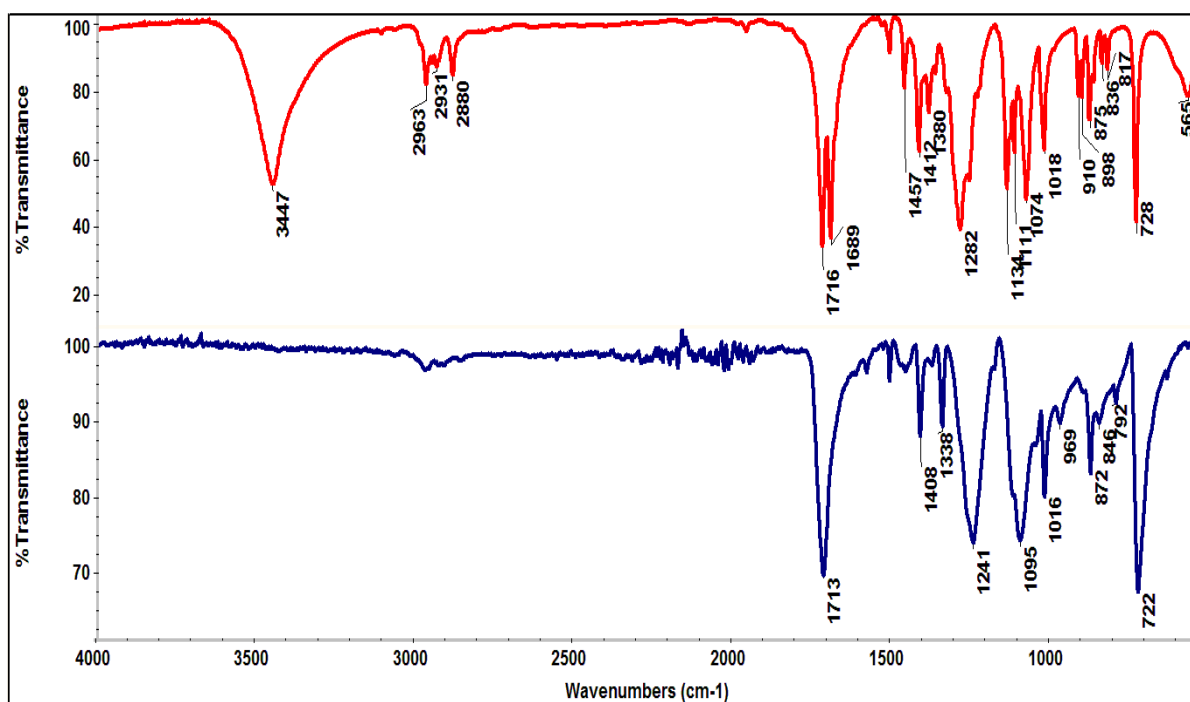

Fig.S<sub>2</sub> Overlaid FTIR spectrum of PET (bottom) and BHET (top)

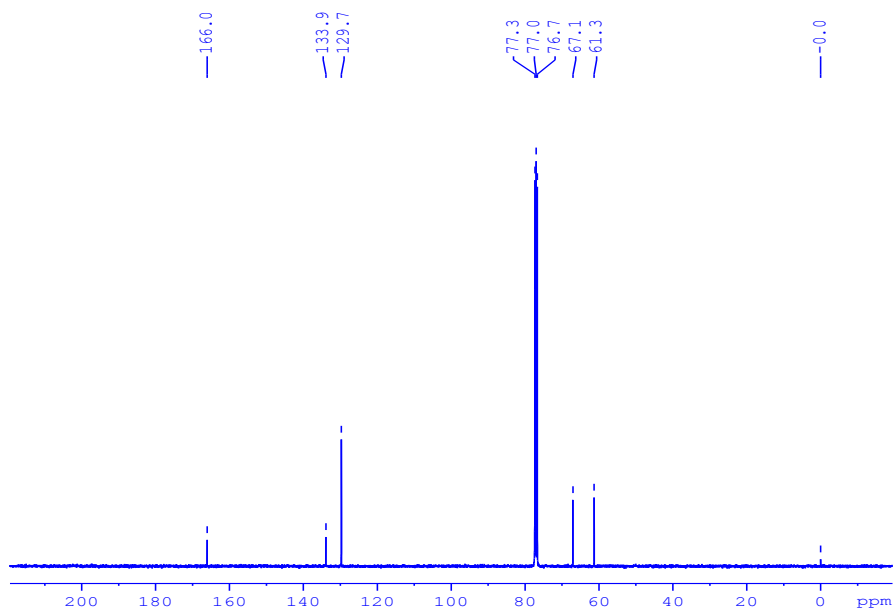

**Fig.S3  $^{13}\text{C}$  NMR of BHET**

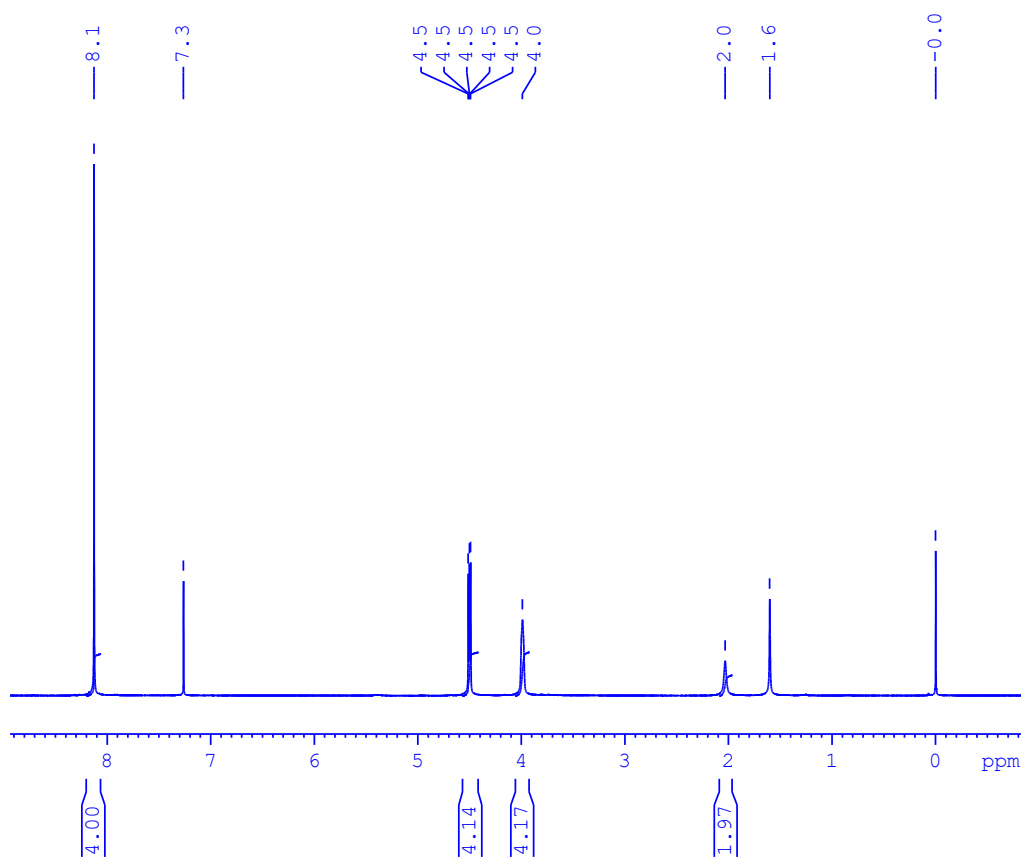

**Fig.S4  $^1\text{H}$  NMR of BHET**

**Table.S1 Properties of Co-Al CO<sub>3</sub> with different Co<sup>2+</sup>/Al<sup>3+</sup> ratios**

| LDH      | Experimental<br>Co/Al Ratio | d003(Å) | d110(Å) | a(Å) | c(Å)  | Crystalite<br>size(nm) |
|----------|-----------------------------|---------|---------|------|-------|------------------------|
| CO-Al-11 | 0.8                         | 7.50    | 1.52    | 3.04 | 22.50 | 13.0                   |
| CO-Al-21 | 1.9                         | 7.53    | 1.53    | 3.06 | 22.59 | 13.0                   |
| CO-Al-31 | 2.7                         | 7.66    | 1.54    | 3.08 | 22.98 | 10.4                   |
| CO-Al-41 | 3.6                         | 7.69    | 1.55    | 3.10 | 23.07 | 9.8                    |

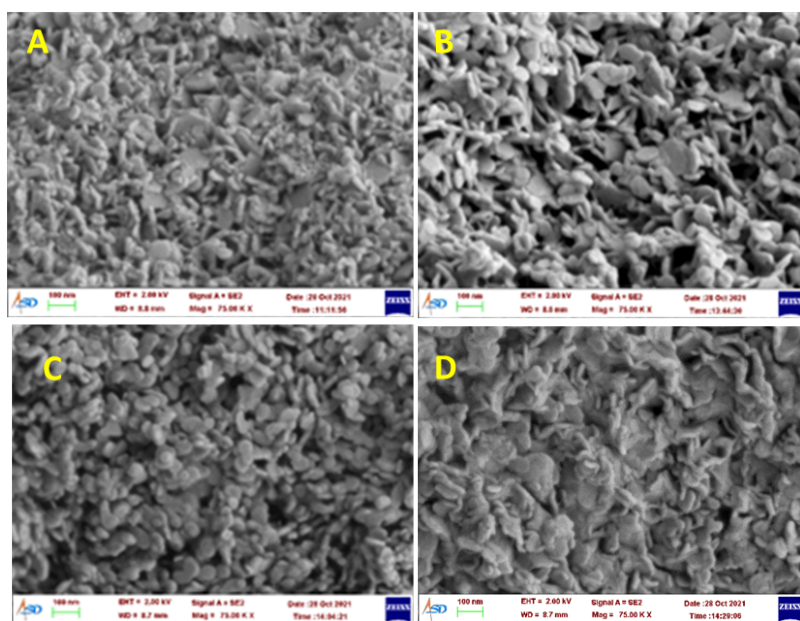

**Fig.S5 FESEM images of Co-Al CO<sub>3</sub> with different Co<sup>2+</sup>/Al<sup>3+</sup> ratios (A) ratio 1:1, (B) ratio 2:1, (C) ratio 3:1 and (D) ratio 4:1**

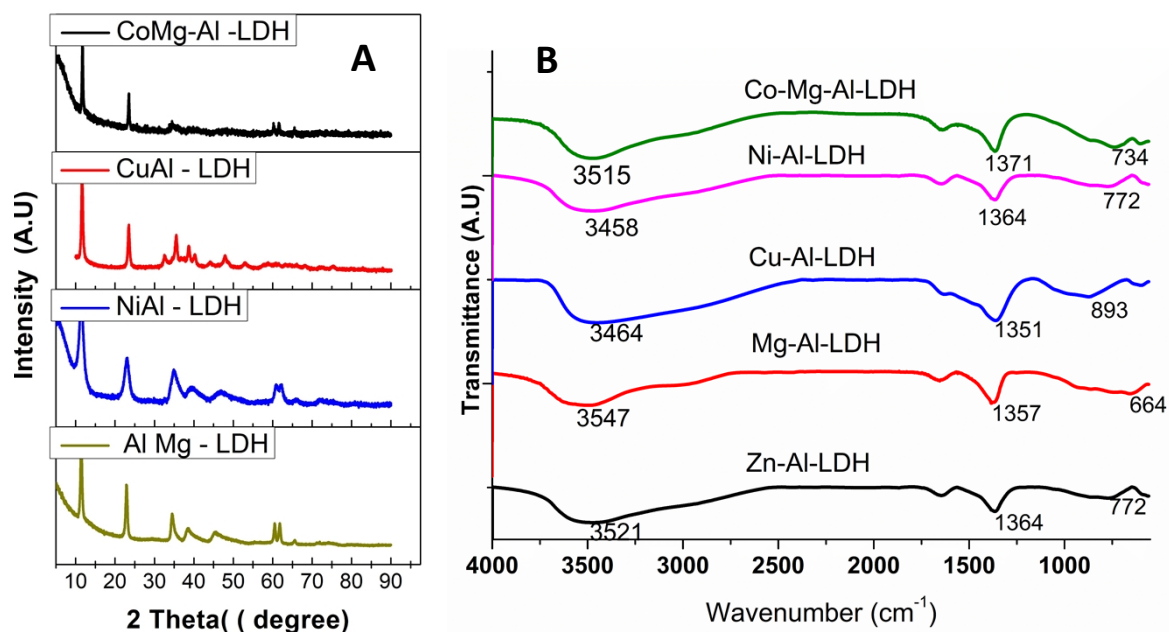

**Fig.S6 (A) XRD and (B) FTIR spectra of LDH materials with different M<sup>2+</sup> cation**

**Table S<sub>2</sub>: Comparison of Cobalt containing catalysts for PET glycolysis**

|   | Catalyst                                    | Temperature (°C) | Time (h) | BHET (%) | Reference                                                                                                               |
|---|---------------------------------------------|------------------|----------|----------|-------------------------------------------------------------------------------------------------------------------------|
| 1 | Co <sub>3</sub> O <sub>4</sub>              | 260              | 1        | 63       | <a href="https://doi.org/10.1016/j.polydegradstab.2013.01.007">https://doi.org/10.1016/j.polydegradstab.2013.01.007</a> |
| 2 | CoCl <sub>2</sub> (anh)                     | 190              | 3        | 65       | <a href="https://doi.org/10.1007/s10562-016-1897-0">https://doi.org/10.1007/s10562-016-1897-0</a> .                     |
|   | CoCl <sub>2</sub> (anh)/dcype               |                  |          | 71       |                                                                                                                         |
|   | CoCl <sub>2</sub> (anh)/dppe                |                  |          | 53       |                                                                                                                         |
|   | CoCl <sub>2</sub> (anh)/dppf                |                  |          | 31       |                                                                                                                         |
|   | CoCl <sub>2</sub> (anh)/BEt <sub>3</sub>    |                  |          | 85       |                                                                                                                         |
| 3 | Recovered CoO from lithium-ion batteries    | 196              | 2        | 10       | <a href="https://doi.org/10.1007/s12649-019-00807-6">https://doi.org/10.1007/s12649-019-00807-6</a>                     |
| 4 | Co NPs                                      | 180              | 3        | 77       | <a href="https://doi.org/10.1021/acssuschemeng.8b02294">https://doi.org/10.1021/acssuschemeng.8b02294</a>               |
| 5 | CoZnO                                       | 196              | 2        | 80       | <a href="https://doi.org/10.1007/s12649-019-00807-6">https://doi.org/10.1007/s12649-019-00807-6</a>                     |
| 6 | rGO/[TESPMI] <sub>2</sub> CoCl <sub>4</sub> | 190              | 3        | 95       | <a href="https://doi.org/10.1016/j.polydegradstab.2021.109691">https://doi.org/10.1016/j.polydegradstab.2021.109691</a> |

|    |                                                              |     |     |    |                                                                                                                           |
|----|--------------------------------------------------------------|-----|-----|----|---------------------------------------------------------------------------------------------------------------------------|
| 7  | CoMn <sub>2</sub> O <sub>4</sub>                             | 260 | 1   | 89 | <a href="https://doi.org/10.1016/j.polymdegradstab.2013.01.007">https://doi.org/10.1016/j.polymdegradstab.2013.01.007</a> |
| 8  | ZnCo <sub>2</sub> O <sub>4</sub>                             | 260 | 1   | 89 | <a href="https://doi.org/10.1016/j.polymdegradstab.2013.01.007">https://doi.org/10.1016/j.polymdegradstab.2013.01.007</a> |
| 9  | CoFe <sub>2</sub> O <sub>4</sub> @ZIF-8/ZIF-67               | 200 | 1   | 84 | <a href="https://doi.org/10.1016/j.fuel.2021.121397">https://doi.org/10.1016/j.fuel.2021.121397</a>                       |
| 10 | CoFe <sub>2</sub> O <sub>4</sub>                             | 195 | 2.5 | 73 | <a href="https://doi.org/10.1016/j.eurpolymj.2021.110590">https://doi.org/10.1016/j.eurpolymj.2021.110590</a>             |
| 11 | CoFe <sub>2</sub> O <sub>4</sub> /C10-OAC                    | 195 | 2.5 | 96 | <a href="https://doi.org/10.1016/j.eurpolymj.2021.110590">https://doi.org/10.1016/j.eurpolymj.2021.110590</a>             |
| 12 | Mechano chemically prepared CoFe <sub>2</sub> O <sub>4</sub> | 190 | 6.0 | 77 | <a href="https://doi.org/10.1016/j.cej.2022.137926">https://doi.org/10.1016/j.cej.2022.137926</a>                         |
| 13 | Co Al 31                                                     | 180 | 2   | 96 | This work                                                                                                                 |
| 13 | Co Al 31@Fe <sub>3</sub> O <sub>4</sub>                      | 180 | 2   | 99 | This work                                                                                                                 |

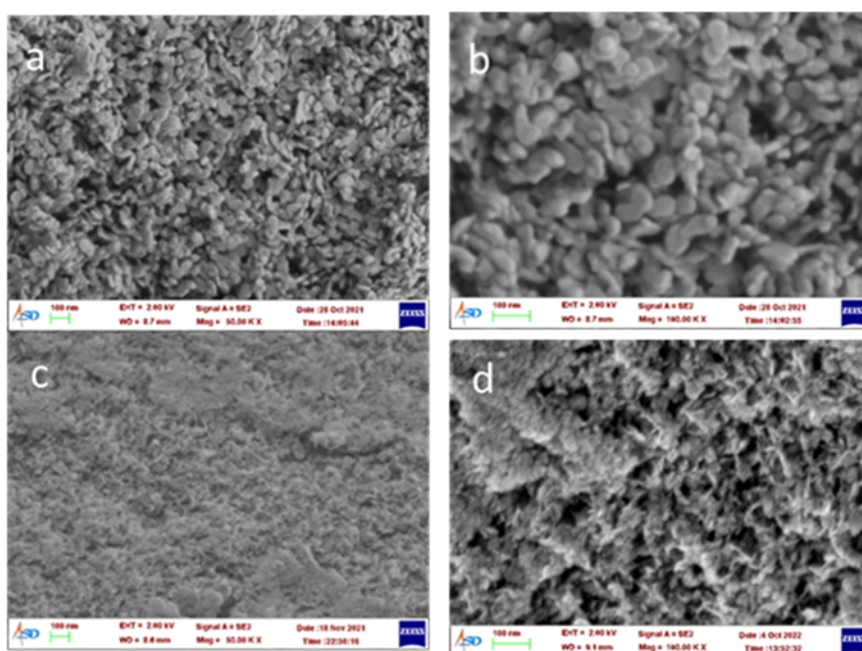

**Fig.S7 FESEM images of (a, b) CoAl-31 LDH and (c, d) NiAl-31 LDH**

**Table S<sub>3</sub> Comparison of Magnetically separable catalysts for PET glycolysis**

|   | Catalyst         | BHET yield (%) | Temperature  | Time (H) | Reference                                                             |
|---|------------------|----------------|--------------|----------|-----------------------------------------------------------------------|
| 1 | Superparamagneti | 90             | 300, 1.1 MPa | 1        | <a href="https://doi.org/10.1039/C3G">https://doi.org/10.1039/C3G</a> |

|    |                                                                                   |      |                   |     |                                                                                                                               |
|----|-----------------------------------------------------------------------------------|------|-------------------|-----|-------------------------------------------------------------------------------------------------------------------------------|
|    | c $\gamma$ -Fe <sub>2</sub> O <sub>3</sub> Nanoparticles                          |      |                   |     | C41834K                                                                                                                       |
| 2  | $\gamma$ -Fe <sub>2</sub> O <sub>3</sub> /nitrogen-doped graphene hybrid material | 100  | 195               | 3   | <a href="http://dx.doi.org/10.1016/j.polyimdegadstab.2017.08.033">http://dx.doi.org/10.1016/j.polyimdegadstab.2017.08.033</a> |
| 3  | Fe <sub>3</sub> O <sub>4</sub> @SiO <sub>2</sub> @(mim)[FeCl <sub>4</sub> ]       | 63   | 170               | 24  | <a href="https://doi.org/10.1016/j.apcatb.2019.118110">https://doi.org/10.1016/j.apcatb.2019.118110</a>                       |
| 4  | $\gamma$ -Fe <sub>2</sub> O <sub>3</sub>                                          | 40   | 195               | 3   | <a href="http://dx.doi.org/10.1016/j.polyimdegadstab.2017.08.033">http://dx.doi.org/10.1016/j.polyimdegadstab.2017.08.033</a> |
| 5  | h-BNNS with Fe <sub>3</sub> O <sub>4</sub> nanoparticles                          | 100  | 200, in autoclave |     | <a href="https://doi.org/10.1016/j.polyimdegadstab.2019.108962">https://doi.org/10.1016/j.polyimdegadstab.2019.108962</a>     |
| 6  | Fe <sub>3</sub> O <sub>4</sub> -boosted MWCNT                                     | 100  | 190               | 2   | <a href="https://doi.org/10.1039/C6GC00534A">https://doi.org/10.1039/C6GC00534A</a> .                                         |
| 7  | ZnO-Fe <sub>3</sub> O <sub>4</sub> magnetic hollow micro-sized nanoaggregates     | 92.3 | 190               | 0.5 | <a href="https://doi.org/10.1039/D3GC01762A">https://doi.org/10.1039/D3GC01762A</a>                                           |
| 8  | Mg-Al-O@Fe <sub>3</sub> O <sub>4</sub>                                            | 31.4 | 240               | 1.5 | <a href="https://doi.org/10.1016/j.wasman.2021.03.049">https://doi.org/10.1016/j.wasman.2021.03.049</a>                       |
| 9  | two-dimensional Fe <sup>III</sup> nanosheets                                      | 100  | 200               | 0.5 | <a href="https://doi.org/10.1039/D0RE00385A">https://doi.org/10.1039/D0RE00385A</a>                                           |
| 10 | Fe <sub>3</sub> O <sub>4</sub> nanodispersions                                    | 93   | 210               | 0.5 | <a href="https://doi.org/10.1021/acscuschemeng.3c01206">https://doi.org/10.1021/acscuschemeng.3c01206</a>                     |
| 11 | Fe <sub>3</sub> O <sub>4</sub> -CP                                                | 93.5 | 190               | 2   | <a href="https://doi.org/10.1039/D3GC01707A">https://doi.org/10.1039/D3GC01707A</a>                                           |
| 12 | Coal @Fe <sub>3</sub> O <sub>4</sub>                                              | 99   | 180               | 2   | This work                                                                                                                     |

**Table S<sub>4</sub> ICP-AES analysis of Co-Al 31@Fe<sub>3</sub>O<sub>4</sub>**

| <b>Element</b>  | <b>Wt.% (from ICP-AES)</b> |
|-----------------|----------------------------|
| <b>Cobalt</b>   | 29.8                       |
| <b>Aluminum</b> | 4.7                        |
| <b>iron</b>     | 18.2                       |
